# Supplementary material for: Covalently linked zinc chlorophyll dimers as a model of a chlorophyllous pair in photosynthetic reaction centers
Source: Royal Society of Chemistry journal article supplement (doi:10.1039/b802353k), 2008-06-04

## Supplementary information

### Covalently linked zinc chlorophyll dimers as a model of a chlorophyllous pair in photosynthetic reaction centers

Hitoshi Tamiaki,<sup>\*a</sup> Kazuhiro Fukai,<sup>a</sup> Hideki Shimazu,<sup>a</sup> Katsunori Nishide,<sup>a</sup> Yutaka Shibata,<sup>b</sup> Shigeru Itoh<sup>b</sup> and Michio Kunieda<sup>a</sup>

<sup>a</sup>Department of Bioscience and Biotechnology, Faculty of Science and Engineering, Ritsumeikan University, Kusatsu, Shiga 525-8577, Japan.

<sup>b</sup>Graduate School of Science, Nagoya University, Chikusa-ku, Nagoya 464-8602, Japan.

The difference of chemical shifts  $\delta$ s in  $^1\text{H}$ -NMR and wavenumbers vs in FT-IR spectra between folded **1a**·(MeOH)<sub>2</sub> and randomly orientated **1a**.

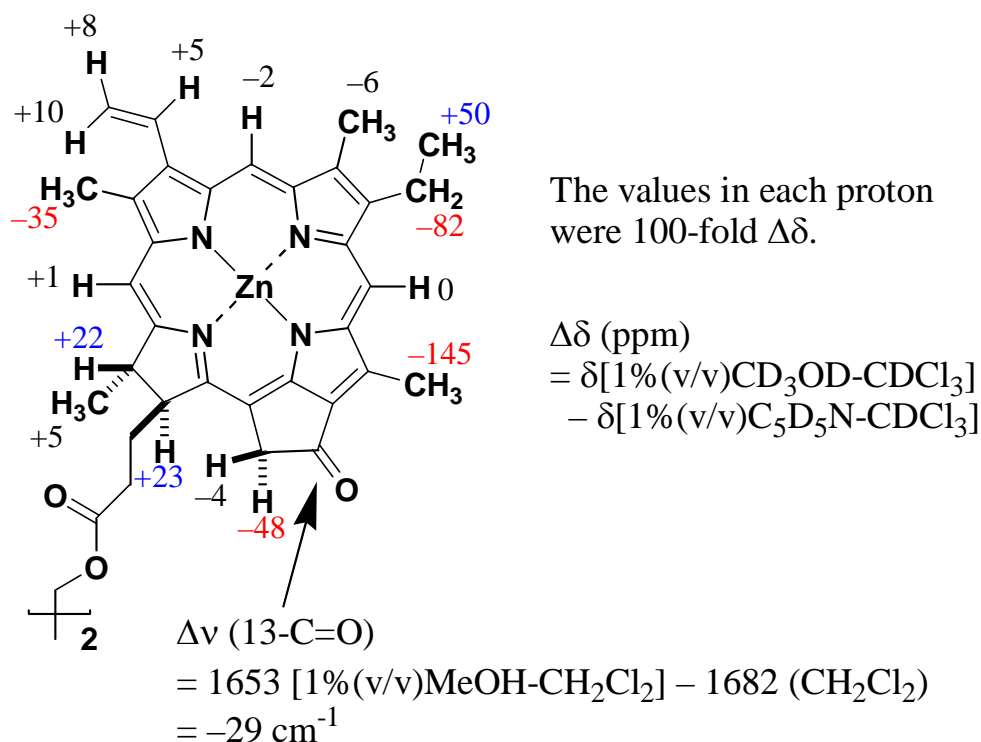

Supplement: b802353k.pdf [file b802353k.pdf]
